# Supplementary material for: Spatiotemporal Pattern, Evolutionary Trend, and Driving Forces Analysis of Ecological Quality in the Irtysh River Basin (2000–2020)
Source: MDPI journal article supplement (doi:10.3390/land13020222), 2024-02-10
Supplement: s1 [file s1]

**Table S 1. The parameters of LT-GEE.**

| Parameter              | Value                  |
|------------------------|------------------------|
| maxSegments            | 6                      |
| spikeThreshold         | 0.9                    |
| vertexCountOvershoot   | 3                      |
| preventOneYearRecovery | True                   |
| recoveryThreshold      | 0.25                   |
| pvalThreshold          | 0.05                   |
| bestModelProportion    | 0.75                   |
| minObservationsNeeded  | 6                      |
| delta                  | loss/gain              |
| sort                   | greatest               |
| year                   | Start:2000<br>End:2020 |
| mag                    | 200                    |
| dur                    | 4                      |
| preval                 | 200                    |
| mmu                    | 11                     |

**Table S 2.** The PCA results and the water threshold for IRB from 2000 to 2020.

3

| Year | Parameters          | EVI     | LST     | SPWI    | NDBSI   | CSI     |
|------|---------------------|---------|---------|---------|---------|---------|
| 2000 | Water threshold     |         |         | -0.0898 |         |         |
|      | Eigenvalues         | 0.1227  | 0.0073  | 0.0047  | 0.0031  | 0.0004  |
|      | Percentage variance | 88.79%  | 5.31%   | 3.37%   | 2.27%   | 0.26%   |
|      | PC1                 | 0.4346  | -0.4346 | 0.4610  | -0.4622 | -0.4428 |
|      | PC2                 | -0.6974 | -0.5770 | 0.2405  | -0.1680 | 0.3077  |
|      | PC3                 | -0.1105 | 0.6405  | 0.4869  | -0.5034 | 0.2952  |
|      | PC4                 | 0.5590  | -0.2563 | 0.0241  | 0.0362  | 0.7874  |
|      | PC5                 | -0.0110 | -0.0477 | -0.7014 | -0.7096 | 0.0464  |
| 2001 | Water threshold     |         |         | -0.0976 |         |         |
|      | Eigenvalues         | 0.1204  | 0.0094  | 0.0042  | 0.0038  | 0.0004  |
|      | Percentage variance | 87.14%  | 6.82%   | 3.02%   | 2.74%   | 0.28%   |
|      | PC1                 | 0.4285  | -0.4370 | 0.4650  | -0.4658 | -0.4385 |
|      | PC2                 | -0.6681 | -0.5213 | 0.2754  | -0.2228 | 0.3954  |
|      | PC3                 | 0.2970  | 0.4654  | 0.3752  | -0.3874 | 0.6359  |
|      | PC4                 | 0.5308  | -0.5644 | -0.2464 | 0.3047  | 0.4961  |
|      | PC5                 | -0.0058 | -0.0465 | -0.7117 | -0.7003 | 0.0300  |
| 2002 | Water threshold     |         |         | -0.0743 |         |         |
|      | Eigenvalues         | 0.1196  | 0.0104  | 0.0038  | 0.0036  | 0.0004  |
|      | Percentage variance | 86.86%  | 7.54%   | 2.72%   | 2.6%    | 0.28%   |
|      | PC1                 | 0.4237  | -0.4383 | 0.4665  | -0.4682 | -0.4376 |
|      | PC2                 | -0.7009 | -0.5107 | 0.2627  | -0.2276 | 0.3565  |
|      | PC3                 | -0.2280 | 0.7394  | 0.4439  | -0.4518 | -0.0047 |
|      | PC4                 | 0.5265  | -0.0068 | 0.1680  | -0.1205 | 0.8246  |
|      | PC5                 | 0.0011  | -0.0165 | -0.6986 | -0.7144 | 0.0372  |
| 2003 | Water threshold     |         |         | -0.0743 |         |         |
|      | Eigenvalues         | 0.1217  | 0.0094  | 0.0038  | 0.0029  | 0.0003  |
|      | Percentage variance | 88.16   | 6.78    | 2.74    | 2.07    | 0.25    |
|      | PC1                 | 0.4350  | -0.4258 | 0.4663  | -0.4655 | -0.4419 |
|      | PC2                 | -0.5768 | -0.6500 | 0.1984  | -0.1513 | 0.4273  |
|      | PC3                 | 0.5328  | -0.5709 | -0.3860 | 0.4528  | 0.1904  |
|      | PC4                 | 0.4406  | 0.2595  | 0.2608  | -0.2909 | 0.7654  |
|      | PC5                 | -0.0032 | -0.0545 | -0.7254 | -0.6861 | 0.0067  |
| 2004 | Water threshold     |         |         | -0.0742 |         |         |
|      | Eigenvalues         | 0.1210  | 0.0108  | 0.0032  | 0.0031  | 0.0003  |
|      | Percentage variance | 87.38   | 7.82    | 2.31    | 2.27    | 0.22    |
|      | PC1                 | 0.4405  | -0.4357 | 0.4646  | -0.4663 | -0.4277 |
|      | PC2                 | 0.4776  | 0.5313  | -0.2856 | 0.2203  | -0.5996 |
|      | PC3                 | 0.2344  | 0.6598  | 0.3795  | -0.4179 | 0.4371  |
|      | PC4                 | -0.7231 | 0.2997  | 0.2219  | -0.2696 | -0.5151 |

|      | PC5                 | -0.0045 | -0.0521 | -0.7137 | -0.6977 | 0.0338  |
|------|---------------------|---------|---------|---------|---------|---------|
| 2005 | Water threshold     |         |         | -0.0585 |         |         |
|      | Eigenvalues         | 0.1233  | 0.0081  | 0.0038  | 0.0028  | 0.0003  |
|      | Percentage variance | 89.18   | 5.85    | 2.74    | 1.99    | 0.24    |
|      | PC1                 | 0.4322  | -0.4326 | 0.4618  | -0.4628 | -0.4456 |
|      | PC2                 | -0.6611 | -0.5772 | 0.2473  | -0.1844 | 0.3669  |
|      | PC3                 | -0.3892 | 0.6761  | 0.4086  | -0.4525 | -0.1404 |
|      | PC4                 | 0.4739  | 0.1436  | 0.2443  | -0.2218 | 0.8037  |
|      | PC5                 | 0.0101  | 0.0442  | 0.7064  | 0.7056  | -0.0338 |
| 2006 | Water threshold     |         |         | -0.0665 |         |         |
|      | Eigenvalues         | 0.1234  | 0.0083  | 0.0036  | 0.0029  | 0.0003  |
|      | Percentage variance | 89.15   | 5.98    | 2.57    | 2.08    | 0.23    |
|      | PC1                 | 0.4364  | -0.4345 | 0.4618  | -0.4620 | -0.4406 |
|      | PC2                 | -0.5964 | -0.5683 | 0.2655  | -0.2009 | 0.4587  |
|      | PC3                 | -0.2061 | 0.6959  | 0.4425  | -0.5144 | 0.1128  |
|      | PC4                 | -0.6412 | 0.0105  | -0.0608 | 0.0515  | -0.7631 |
|      | PC5                 | 0.0127  | 0.0615  | 0.7188  | 0.6920  | -0.0203 |
| 2007 | Water threshold     |         |         | -0.0586 |         |         |
|      | Eigenvalues         | 0.1244  | 0.0078  | 0.0035  | 0.0026  | 0.0003  |
|      | Percentage variance | 89.81   | 5.59    | 2.51    | 1.86    | 0.23    |
|      | PC1                 | 0.4276  | -0.4374 | 0.4610  | -0.4604 | -0.4487 |
|      | PC2                 | -0.7449 | -0.5161 | 0.2415  | -0.2207 | 0.2678  |
|      | PC3                 | -0.2159 | 0.7308  | 0.4354  | -0.4789 | 0.0206  |
|      | PC4                 | -0.4643 | 0.0859  | -0.1546 | 0.1630  | -0.8524 |
|      | PC5                 | -0.0069 | -0.0297 | -0.7181 | -0.6953 | -0.0019 |
| 2008 | Water threshold     |         |         | -0.0429 |         |         |
|      | Eigenvalues         | 0.1260  | 0.0069  | 0.0032  | 0.0022  | 0.0003  |
|      | Percentage variance | 90.86   | 4.96    | 2.34    | 1.62    | 0.23    |
|      | PC1                 | 0.4371  | -0.4353 | 0.4579  | -0.4592 | -0.4460 |
|      | PC2                 | -0.6353 | -0.5903 | 0.2507  | -0.1763 | 0.3925  |
|      | PC3                 | -0.1145 | 0.6549  | 0.4843  | -0.5037 | 0.2642  |
|      | PC4                 | 0.6261  | -0.1766 | 0.0024  | 0.0285  | 0.7590  |
|      | PC5                 | -0.0186 | -0.0436 | -0.7021 | -0.7097 | 0.0341  |
| 2009 | Water threshold     |         |         | -0.0586 |         |         |
|      | Eigenvalues         | 0.1240  | 0.0076  | 0.0041  | 0.0023  | 0.0004  |
|      | Percentage variance | 89.64   | 5.49    | 2.94    | 1.67    | 0.26    |
|      | PC1                 | 0.4358  | -0.4284 | 0.4605  | -0.4604 | -0.4500 |
|      | PC2                 | -0.6416 | -0.6210 | 0.2306  | -0.1480 | 0.3573  |
|      | PC3                 | -0.3048 | 0.6524  | 0.4533  | -0.5194 | 0.0789  |
|      | PC4                 | 0.5523  | -0.0260 | 0.1248  | -0.1241 | 0.8144  |
|      | PC5                 | 0.0230  | 0.0670  | 0.7167  | 0.6935  | -0.0176 |

|      |                     |         |         |         |         |         |
|------|---------------------|---------|---------|---------|---------|---------|
| 2010 | Water threshold     |         |         | -0.0743 |         |         |
|      | Eigenvalues         | 0.1266  | 0.0062  | 0.0030  | 0.0026  | 0.0003  |
|      | Percentage variance | 91.3    | 4.49    | 2.13    | 1.84    | 0.24    |
|      | PC1                 | 0.4399  | -0.4363 | 0.4585  | -0.4583 | -0.4426 |
|      | PC2                 | -0.5726 | -0.6220 | 0.2332  | -0.1613 | 0.4527  |
|      | PC3                 | -0.1337 | 0.6360  | 0.4637  | -0.5356 | 0.2751  |
|      | PC4                 | 0.6788  | -0.1176 | -0.0190 | 0.0460  | 0.7232  |
|      | PC5                 | -0.0093 | -0.0665 | -0.7211 | -0.6892 | 0.0228  |
| 2011 | Water threshold     | -0.0430 |         |         |         |         |
|      | Eigenvalues         | 0.1241  | 0.0077  | 0.0041  | 0.0023  | 0.0004  |
|      | Percentage variance | 89.57   | 5.55    | 2.95    | 1.64    | 0.29    |
|      | PC1                 | 0.4344  | -0.4286 | 0.4605  | -0.4607 | -0.4509 |
|      | PC2                 | -0.6473 | -0.6510 | 0.2009  | -0.1180 | 0.3208  |
|      | PC3                 | -0.3608 | 0.6228  | 0.4591  | -0.5175 | 0.0580  |
|      | PC4                 | -0.5119 | 0.0205  | -0.1869 | 0.1229  | -0.8292 |
|      | PC5                 | 0.0001  | -0.0650 | -0.7084 | -0.7007 | 0.0541  |
| 2012 | Water threshold     |         |         | -0.0585 |         |         |
|      | Eigenvalues         | 0.1262  | 0.0065  | 0.0035  | 0.0021  | 0.0003  |
|      | Percentage variance | 91.03   | 4.72    | 2.49    | 1.52    | 0.25    |
|      | PC1                 | 0.4386  | -0.4299 | 0.4591  | -0.4583 | -0.4494 |
|      | PC2                 | -0.6045 | -0.7025 | 0.1512  | -0.0928 | 0.3311  |
|      | PC3                 | -0.3543 | 0.5605  | 0.4831  | -0.5463 | 0.1686  |
|      | PC4                 | -0.5626 | 0.0658  | -0.1195 | 0.0761  | -0.8118 |
|      | PC5                 | 0.0084  | -0.0565 | -0.7202 | -0.6908 | 0.0308  |
| 2013 | Water threshold     |         |         | -0.0977 |         |         |
|      | Eigenvalues         | 0.1222  | 0.0083  | 0.0043  | 0.0029  | 0.0004  |
|      | Percentage variance | 88.46   | 6.04    | 3.11    | 2.1     | 0.3     |
|      | PC1                 | 0.4281  | -0.4335 | 0.4625  | -0.4634 | -0.4475 |
|      | PC2                 | -0.7236 | -0.5314 | 0.2566  | -0.2012 | 0.2962  |
|      | PC3                 | -0.3202 | 0.7229  | 0.3999  | -0.4441 | -0.1334 |
|      | PC4                 | 0.4366  | 0.0738  | 0.2537  | -0.2162 | 0.8323  |
|      | PC5                 | 0.0071  | 0.0413  | 0.7042  | 0.7077  | -0.0382 |
| 2014 | Water threshold     |         |         | -0.0742 |         |         |
|      | Eigenvalues         | 0.1258  | 0.0069  | 0.0032  | 0.0024  | 0.0004  |
|      | Percentage variance | 90.75   | 4.97    | 2.3     | 1.72    | 0.26    |
|      | PC1                 | 0.4334  | -0.4362 | 0.4589  | -0.4591 | -0.4478 |
|      | PC2                 | -0.6923 | -0.5768 | 0.2332  | -0.1817 | 0.3171  |
|      | PC3                 | -0.2484 | 0.6846  | 0.4549  | -0.5065 | 0.0784  |
|      | PC4                 | 0.5208  | -0.0774 | 0.1448  | -0.1013 | 0.8316  |
|      | PC5                 | -0.0002 | -0.0484 | -0.7121 | -0.6996 | 0.0344  |
| 2015 | Water threshold     |         |         | -0.0820 |         |         |
|      | Eigenvalues         | 0.1236  | 0.0081  | 0.0033  | 0.0030  | 0.0004  |

|      |                     |         |         |         |         |         |
|------|---------------------|---------|---------|---------|---------|---------|
|      | Percentage variance | 89.26   | 5.87    | 2.41    | 2.18    | 0.28    |
|      | PC1                 | 0.4300  | -0.4372 | 0.4623  | -0.4620 | -0.4436 |
|      | PC2                 | -0.6871 | -0.5502 | 0.2397  | -0.2142 | 0.3491  |
|      | PC3                 | 0.4232  | -0.6712 | -0.3542 | 0.4135  | 0.2718  |
|      | PC4                 | 0.4049  | 0.2329  | 0.3007  | -0.2907 | 0.7790  |
|      | PC5                 | 0.0083  | -0.0365 | -0.7162 | -0.6965 | 0.0231  |
| 2016 | Water threshold     |         |         | -0.0977 |         |         |
|      | Eigenvalues         | 0.1210  | 0.0080  | 0.0050  | 0.0030  | 0.0004  |
|      | Percentage variance | 88.06   | 5.82    | 3.66    | 2.17    | 0.29    |
|      | PC1                 | 0.4341  | -0.4240 | 0.4664  | -0.4641 | -0.4461 |
|      | PC2                 | -0.6480 | -0.6266 | 0.2104  | -0.1542 | 0.3455  |
|      | PC3                 | -0.4709 | 0.6263  | 0.3773  | -0.4588 | -0.1818 |
|      | PC4                 | 0.4118  | 0.1740  | 0.2381  | -0.3085 | 0.8052  |
|      | PC5                 | 0.0185  | 0.0706  | 0.7343  | 0.6747  | 0.0167  |
|      | Water threshold     |         |         | -0.0743 |         |         |
| 2017 | Eigenvalues         | 0.1228  | 0.0081  | 0.0037  | 0.0033  | 0.0004  |
|      | Percentage variance | 88.83   | 5.85    | 2.66    | 2.36    | 0.3     |
|      | PC1                 | 0.4309  | -0.4387 | 0.4635  | -0.4634 | -0.4385 |
|      | PC2                 | -0.6712 | -0.5505 | 0.2433  | -0.2149 | 0.3755  |
|      | PC3                 | 0.5970  | -0.2049 | 0.0029  | 0.0181  | 0.7754  |
|      | PC4                 | -0.0858 | 0.6793  | 0.4638  | -0.5008 | 0.2555  |
|      | PC5                 | -0.0023 | -0.0319 | -0.7148 | -0.6985 | 0.0124  |
|      | Water threshold     |         |         | -0.0743 |         |         |
|      | Eigenvalues         | 0.1224  | 0.0080  | 0.0042  | 0.0031  | 0.0004  |
| 2018 | Percentage variance | 88.6    | 5.81    | 3.06    | 2.22    | 0.3     |
|      | PC1                 | 0.4296  | -0.4360 | 0.4627  | -0.4615 | -0.4453 |
|      | PC2                 | -0.7235 | -0.5058 | 0.2664  | -0.2293 | 0.3117  |
|      | PC3                 | -0.2382 | 0.7424  | 0.4016  | -0.4784 | -0.0434 |
|      | PC4                 | 0.4848  | -0.0054 | 0.1633  | -0.1888 | 0.8382  |
|      | PC5                 | 0.0144  | 0.0540  | 0.7259  | 0.6855  | 0.0049  |
|      | Water threshold     |         |         | -0.0743 |         |         |
|      | Eigenvalues         | 0.1257  | 0.0068  | 0.0032  | 0.0025  | 0.0004  |
|      | Percentage variance | 90.68   | 4.93    | 2.33    | 1.79    | 0.28    |
| 2019 | PC1                 | 0.4349  | -0.4341 | 0.4595  | -0.4599 | -0.4470 |
|      | PC2                 | -0.6544 | -0.6298 | 0.2061  | -0.1437 | 0.3348  |
|      | PC3                 | 0.4155  | -0.6363 | -0.4316 | 0.4784  | 0.0862  |
|      | PC4                 | 0.4583  | 0.0885  | 0.2350  | -0.2168 | 0.8246  |
|      | PC5                 | -0.0093 | -0.0477 | -0.7105 | -0.7014 | 0.0284  |
|      | Water threshold     |         |         | -0.0509 |         |         |
|      | Eigenvalues         | 0.1248  | 0.0074  | 0.0035  | 0.0023  | 0.0004  |
|      | Percentage variance | 90.21   | 5.31    | 2.54    | 1.65    | 0.28    |
|      | PC1                 | 0.4400  | -0.4245 | 0.4622  | -0.4607 | -0.4476 |
| 2020 |                     |         |         |         |         |         |
|      |                     |         |         |         |         |         |

---

|     |         |         |         |         |        |
|-----|---------|---------|---------|---------|--------|
| PC2 | -0.5250 | -0.7469 | 0.1286  | -0.0564 | 0.3830 |
| PC3 | 0.5418  | -0.4915 | -0.4397 | 0.5210  | 0.0084 |
| PC4 | 0.4870  | 0.1249  | 0.2080  | -0.2261 | 0.8080 |
| PC5 | -0.0015 | -0.0687 | -0.7302 | -0.6797 | 0.0093 |

---

Table S3 Research Paper Formulas and Parameters Overview.

5

| Formula Number | Equation                                                                                                                    | Parameter Descriptions                                                                                                                                                                                                                                                                                                                                                                                                                                 |
|----------------|-----------------------------------------------------------------------------------------------------------------------------|--------------------------------------------------------------------------------------------------------------------------------------------------------------------------------------------------------------------------------------------------------------------------------------------------------------------------------------------------------------------------------------------------------------------------------------------------------|
| (1)            | $PC_i = f(EVI, SPWI, LST, NDBSI, CSI)$                                                                                      | where $f(\cdot)$ represents the PCA operation; $PC_i$ is the obtained principal component; $PC_1$ is the first principal component; ARSEI is the ultimate result of PC1, with its values representing the assessment out-comes of EQ. High values indicate better EQ, while low values suggest poorer EQ.                                                                                                                                              |
| (2)            | $ARSEI = 1 - PC_1$                                                                                                          |                                                                                                                                                                                                                                                                                                                                                                                                                                                        |
| (3)            | $X' = (X - X_{\min}) / (X_{\max} - X_{\min})$                                                                               | where $X'$ indicates the normalized ARSEI, $X_{\max}$ is the maximum value of ARSEI, and $X_{\min}$ is the minimum value of ARSEI.                                                                                                                                                                                                                                                                                                                     |
| (4)            | $CV_{ARSEI} = \sigma_{ARSEI} / \overline{ARSEI}$                                                                            | where $\sigma_{ARSEI}$ is the standard deviation of ARSEI, and $\overline{ARSEI}$ is the mean of ARSEI.                                                                                                                                                                                                                                                                                                                                                |
| (5)            | $S_{ARSEI} = \text{Median}((X_j - X_i) / (j - i)), \forall j > i$                                                           | where $S_{ARSEI}$ is the Theil-Sen Median slope; Median is the median function; ARSEI inclines when $S_{ARSEI} > 0$ , and ARSEI declines when $S_{ARSEI} < 0$ .                                                                                                                                                                                                                                                                                        |
| (6)            | $\text{sgn}(x_j - x_i) = \begin{cases} 1 & (x_j - x_i > 0) \\ 0 & (x_j - x_i = 0) \\ -1 & (x_j - x_i < 0) \end{cases}$      |                                                                                                                                                                                                                                                                                                                                                                                                                                                        |
| (7)            | $S = \sum_{i=1}^{n-1} \sum_{j=i+1}^n \text{sgn}(x_j - x_i)$                                                                 | In the formula: $\text{sgn}$ is a sign function; $n$ is the amount of data in the sequence; $S$ is the test statistic; when $ z  < \mu_{1-\frac{\alpha}{2}}$ is the significant change in the ARSEI studied at a given significant level $\alpha$ .                                                                                                                                                                                                    |
| (8)            | $\text{VAR}(S) = n(n-1)(2n+5)/18$                                                                                           |                                                                                                                                                                                                                                                                                                                                                                                                                                                        |
| (9)            | $Z = \begin{cases} (S-1)/\sqrt{\text{VAR}(S)} & (S > 0) \\ 0 & (S = 0) \\ (S+1)/\sqrt{\text{VAR}(S)} & (S < 0) \end{cases}$ |                                                                                                                                                                                                                                                                                                                                                                                                                                                        |
| (10)           | $P_{i,k(x)}^d = \sum_{n=1}^M I(h_n(x) = d) / M$                                                                             | where $P_{i,k(x)}^d$ is the development of probability of land type $k$ in unit $i$ ; when $d$ is 1, it means that it converted other land use types to type $k$ , and when $d$ is 0, it means other transitions; $x$ is a vector composed of multiple driving factors; $I$ is the indicator function of the decision tree; $h_n(x)$ is the prediction type of the $n$ th decision tree of the vector $x$ ; $M$ is the total number of decision trees. |

6
